# Supplementary material for: Influence of Mixed Conifer Forest Thinning and Prescribed Fire on Soil Temperature and Moisture Dynamics in Proximity to Forest Logs: A Case Study in New Mexico, USA
Source: MDPI journal article supplement (doi:10.3390/f14061117), 2023-05-28
Supplement: s1 [file s1]

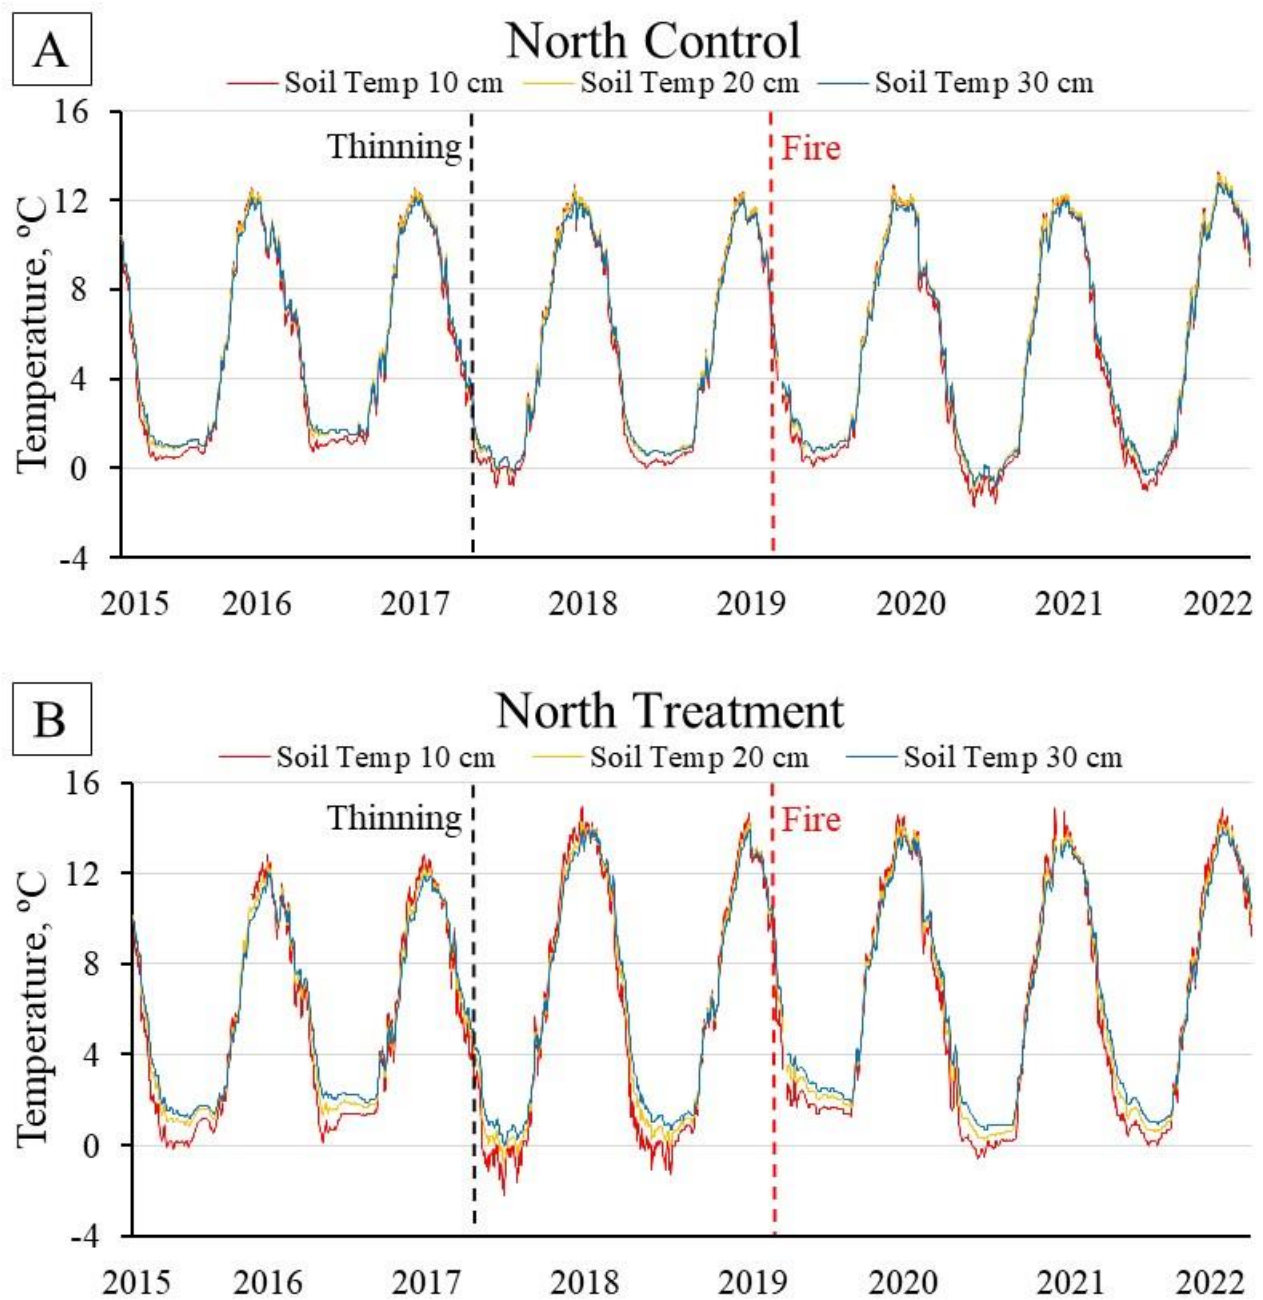

Figure S3. Soil temperature dynamics beneath logs during 2015-2022 on the Cerro Seco study site, Valles Caldera National Preserve, NM. A: North Control site; B: North Treatment site.
