# Supplementary material for: Influence of Mixed Conifer Forest Thinning and Prescribed Fire on Soil Temperature and Moisture Dynamics in Proximity to Forest Logs: A Case Study in New Mexico, USA
Source: MDPI journal article supplement (doi:10.3390/f14061117), 2023-05-28
Supplement: s1 [file s1]

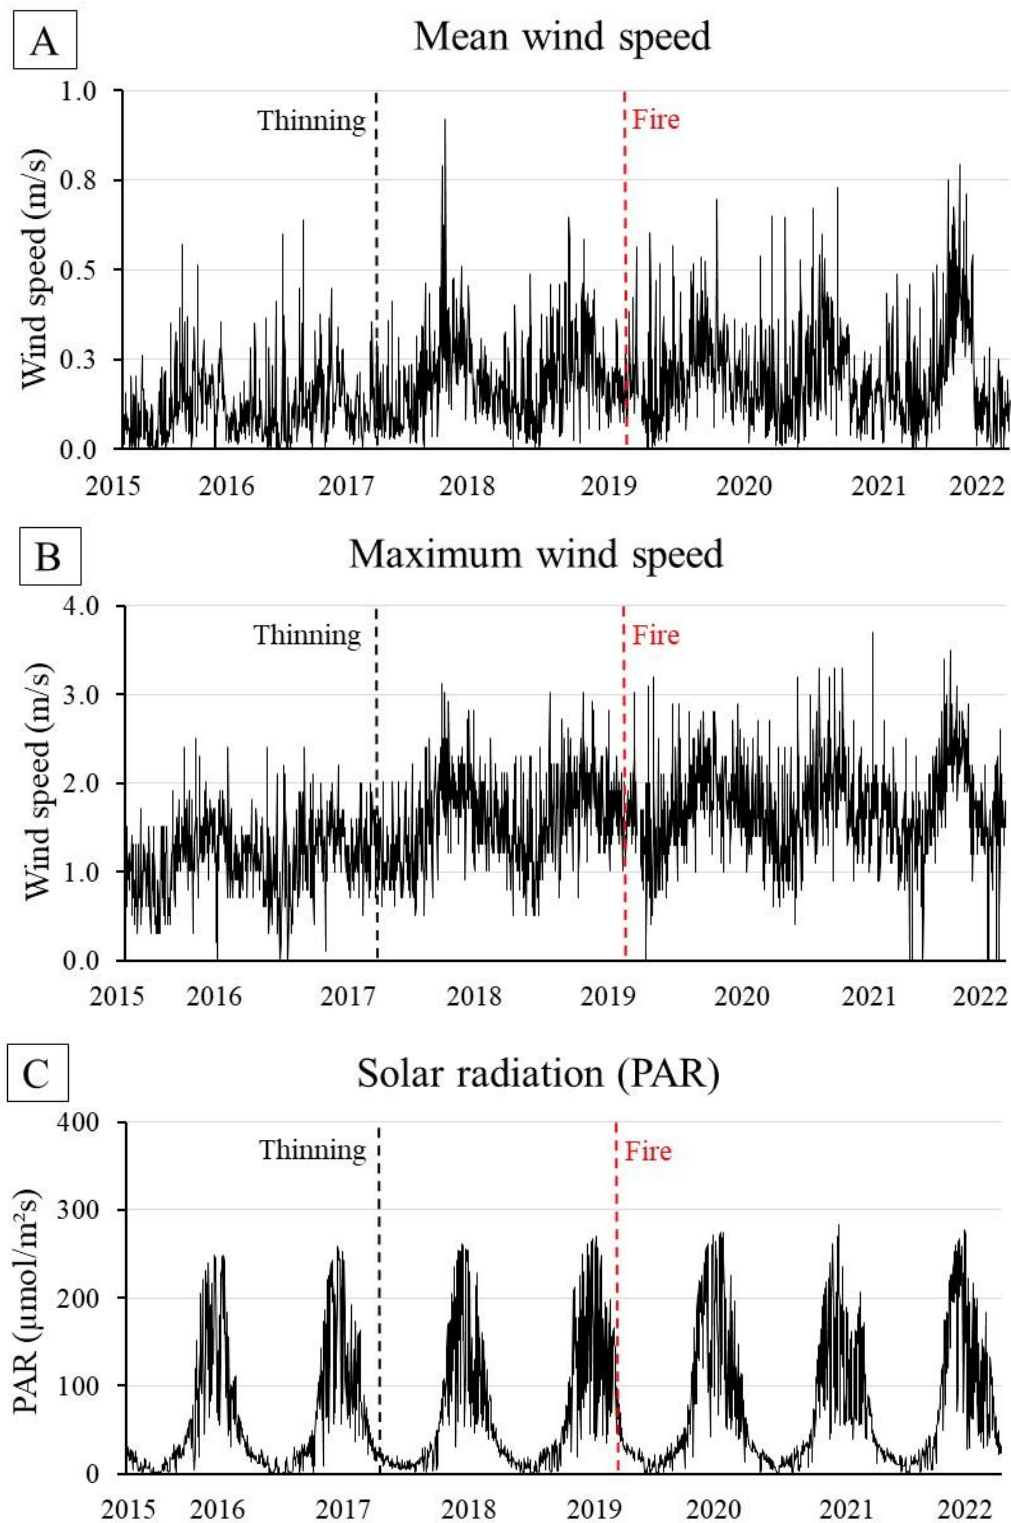

Figure S2. North Control site (A) mean wind speed, (B) maximum wind speed and (C) Photosynthetically Active Radiation (PAR) during 2015-2022, Valles Caldera National Preserve, NM.
