# Supplementary material for: Influence of Mixed Conifer Forest Thinning and Prescribed Fire on Soil Temperature and Moisture Dynamics in Proximity to Forest Logs: A Case Study in New Mexico, USA
Source: MDPI journal article supplement (doi:10.3390/f14061117), 2023-05-28
Supplement: s1 [file s1]

Table S6. Repeated Measures ANOVA Table for soil temperature at 10 cm depth on the Cerro Seco study site, Valles Caldera National Preserve, New Mexico. Treatment = Control/Thin-burned; Location = Log/N1/N2/S1/S2; Period = Pre-thinning/Post-thinning/Post-burning; Season = Fall/Winter/Spring/Summer. Subject = Replicate weekly means of variable tested.

| <b>Source</b>   | <b>DF</b> | <b>SS</b> | <b>MS</b> | <b>F</b> | <b>P</b> |
|-----------------|-----------|-----------|-----------|----------|----------|
| Treatment (A)   | 1         | 1453      | 1453.0    | 334.36   | 0.0000   |
| Location (B)    | 4         | 209       | 52.3      | 12.03    | 0.0000   |
| A*B             | 4         | 47        | 11.7      | 2.69     | 0.0309   |
| Subject (C)     |           |           |           |          |          |
| Error A*B*C     | 350       | 1521      | 4.3       |          |          |
| Period (D)      | 2         | 1029      | 514.6     | 149.44   | 0.0000   |
| A*D             | 2         | 491       | 245.4     | 71.27    | 0.0000   |
| B*D             | 8         | 29        | 3.6       | 1.06     | 0.3918   |
| A*B*D           | 8         | 32        | 4.0       | 1.17     | 0.3131   |
| Error A*B*C*D   | 700       | 2410      | 3.4       |          |          |
| Season (E)      | 3         | 82817     | 27605.6   | 3153.06  | 0.0000   |
| A*E             | 3         | 427       | 142.4     | 16.26    | 0.0000   |
| B*E             | 12        | 829       | 69.1      | 7.89     | 0.0000   |
| A*B*E           | 12        | 41        | 3.4       | 0.39     | 0.9673   |
| Error A*B*C*E   | 1050      | 9193      | 8.8       |          |          |
| D*E             | 6         | 808       | 134.7     | 49.61    | 0.0000   |
| A*D*E           | 6         | 233       | 38.8      | 14.27    | 0.0000   |
| B*D*E           | 24        | 39        | 1.6       | 0.60     | 0.9376   |
| A*B*D*E         | 24        | 45        | 1.9       | 0.69     | 0.8637   |
| Error A*B*C*D*E | 2100      | 5703      | 2.7       |          |          |
| Total           | 4319      | 107357    |           |          |          |

Table S7. Repeated Measures ANOVA Table for soil temperature at 20 cm depth on the Cerro Seco study site, Valles Caldera National Preserve, New Mexico. Treatment = Control/Thin-burned; Location = Log/N1/N2/S1/S2; Period = Pre-thinning/Post-thinning/Post-burning; Season = Fall/Winter/Spring/Summer. Subject = Replicate weekly means of variable tested.

| Source          | DF   | SS      | MS      | F       | P      |
|-----------------|------|---------|---------|---------|--------|
| TREATMENT (A)   | 1    | 1400.6  | 1400.6  | 323.10  | 0.0000 |
| Location (B)    | 4    | 155.1   | 38.8    | 8.94    | 0.0000 |
| A*B             | 4    | 55.3    | 13.8    | 3.19    | 0.0136 |
| Subject (C)     |      |         |         |         |        |
| Error A*B*C     | 350  | 1517.2  | 4.3     |         |        |
| Period (D)      | 2    | 994.1   | 497.0   | 178.79  | 0.0000 |
| A*D             | 2    | 467.4   | 233.7   | 84.07   | 0.0000 |
| B*D             | 8    | 24.7    | 3.1     | 1.11    | 0.3529 |
| A*B*D           | 8    | 27.4    | 3.4     | 1.23    | 0.2763 |
| Error A*B*C*D   | 700  | 1946.0  | 2.8     |         |        |
| Season (E)      | 3    | 73013.1 | 24337.7 | 3082.68 | 0.0000 |
| A*E             | 3    | 285.6   | 95.2    | 12.06   | 0.0000 |
| B*E             | 12   | 763.0   | 63.6    | 8.05    | 0.0000 |
| A*B*E           | 12   | 68.3    | 5.7     | 0.72    | 0.7323 |
| Error A*B*C*E   | 1050 | 8289.7  | 7.9     |         |        |
| D*E             | 6    | 683.8   | 114.0   | 50.40   | 0.0000 |
| A*D*E           | 6    | 191.2   | 31.9    | 14.09   | 0.0000 |
| B*D*E           | 24   | 27.2    | 1.1     | 0.50    | 0.9791 |
| A*B*D*E         | 24   | 30.0    | 1.2     | 0.55    | 0.9611 |
| Error A*B*C*D*E | 2100 | 4748.4  | 2.3     |         |        |
| Total           | 4319 | 94688.2 |         |         |        |

Table S8. Repeated Measures ANOVA Table for soil temperature at 30 cm depth on the Cerro Seco study site, Valles Caldera National Preserve, New Mexico. Treatment = Control/Thin-burned; Location = Log/N1/N2/S1/S2; Period = Pre-thinning/Post-thinning/Post-burning; Season = Fall/Winter/Spring/Summer. Subject = Replicate weekly means of variable tested.

| Source          | DF   | SS      | MS      | F       | P      |
|-----------------|------|---------|---------|---------|--------|
| TREATMENT (A)   | 1    | 1185.7  | 1185.7  | 267.98  | 0.0000 |
| Location (B)    | 4    | 72.2    | 18.0    | 4.08    | 0.0030 |
| A*B             | 4    | 61.7    | 15.4    | 3.49    | 0.0083 |
| Subject (C)     |      |         |         |         |        |
| Error A*B*C     | 350  | 1548.6  | 4.4     |         |        |
| Period (D)      | 2    | 919.2   | 459.6   | 206.32  | 0.0000 |
| A*D             | 2    | 463.1   | 231.6   | 103.95  | 0.0000 |
| B*D             | 8    | 17.3    | 2.2     | 0.97    | 0.4562 |
| A*B*D           | 8    | 25.5    | 3.2     | 1.43    | 0.1794 |
| Error A*B*C*D   | 700  | 1559.4  | 2.2     |         |        |
| Season (E)      | 3    | 64348.2 | 21449.4 | 2987.96 | 0.0000 |
| A*E             | 3    | 194.9   | 65.0    | 9.05    | 0.0000 |
| B*E             | 12   | 532.9   | 44.4    | 6.19    | 0.0000 |
| A*B*E           | 12   | 106.0   | 8.8     | 1.23    | 0.2567 |
| Error A*B*C*E   | 1050 | 7537.5  | 7.2     |         |        |
| D*E             | 6    | 585.2   | 97.5    | 53.13   | 0.0000 |
| A*D*E           | 6    | 169.1   | 28.2    | 15.35   | 0.0000 |
| B*D*E           | 24   | 18.6    | 0.8     | 0.42    | 0.9939 |
| A*B*D*E         | 24   | 30.6    | 1.3     | 0.69    | 0.8623 |
| Error A*B*C*D*E | 2100 | 3854.8  | 1.8     |         |        |
| Total           | 4319 | 83230.4 |         |         |        |

Table S9. Repeated Measures ANOVA Table for soil Volumetric Water Content (VWC) at 10 cm depth on the Cerro Seco study site, Valles Caldera National Preserve, New Mexico.

Treatment = Control/Thin-burned; Location = Log/N1/N2/S1/S2; Period = Pre-thinning/Post-thinning/Post-burning; Season = Fall/Winter/Spring/Summer.  
Subject = Replicate weekly means of variable tested.

| <b>Source</b>   | <b>DF</b> | <b>SS</b> | <b>MS</b> | <b>F</b> | <b>P</b> |
|-----------------|-----------|-----------|-----------|----------|----------|
| TREATMENT (A)   | 1         | 0.0315    | 0.03148   | 9.56     | 0.0021   |
| Location (B)    | 4         | 0.9204    | 0.23009   | 69.90    | 0.0000   |
| A*B             | 4         | 0.0487    | 0.01217   | 3.70     | 0.0058   |
| Subject (C)     |           |           |           |          |          |
| Error A*B*C     | 350       | 1.1520    | 0.00329   |          |          |
| Period (D)      | 2         | 1.2354    | 0.61768   | 293.03   | 0.0000   |
| A*D             | 2         | 0.0098    | 0.00491   | 2.33     | 0.0981   |
| B*D             | 8         | 0.2916    | 0.03644   | 17.29    | 0.0000   |
| A*B*D           | 8         | 0.2740    | 0.03425   | 16.25    | 0.0000   |
| Error A*B*C*D   | 700       | 1.4755    | 0.00211   |          |          |
| Season (E)      | 3         | 2.3358    | 0.77859   | 288.58   | 0.0000   |
| A*E             | 3         | 0.0058    | 0.00192   | 0.71     | 0.5452   |
| B*E             | 12        | 0.1154    | 0.00962   | 3.57     | 0.0000   |
| A*B*E           | 12        | 0.0580    | 0.00483   | 1.79     | 0.0450   |
| Error A*B*C*E   | 1050      | 2.8329    | 0.00270   |          |          |
| D*E             | 6         | 0.0462    | 0.00770   | 3.68     | 0.0012   |
| A*D*E           | 6         | 0.0155    | 0.00259   | 1.24     | 0.2843   |
| B*D*E           | 24        | 0.1121    | 0.00467   | 2.23     | 0.0005   |
| A*B*D*E         | 24        | 0.0803    | 0.00335   | 1.60     | 0.0326   |
| Error A*B*C*D*E | 2100      | 4.3903    | 0.00209   |          |          |
| Total           | 4319      | 15.4311   |           |          |          |

Table S10. Repeated Measures ANOVA Table for soil Volumetric Water Content (VWC) at 20 cm depth on the Cerro Seco study site, Valles Caldera National Preserve, New Mexico.

Treatment = Control/Thin-burned; Location = Log/N1/N2/S1/S2; Period = Pre-thinning/Post-thinning/Post-burning; Season = Fall/Winter/Spring/Summer.  
Subject = Replicate weekly means of variable tested.

| <b>Source</b>   | <b>DF</b> | <b>SS</b> | <b>MS</b> | <b>F</b> | <b>P</b> |
|-----------------|-----------|-----------|-----------|----------|----------|
| TREATMENT (A)   | 1         | 0.0599    | 0.05993   | 18.56    | 0.0000   |
| Location (B)    | 4         | 0.3929    | 0.09822   | 30.42    | 0.0000   |
| A*B             | 4         | 0.2216    | 0.05540   | 17.15    | 0.0000   |
| Subject (C)     |           |           |           |          |          |
| Error A*B*C     | 350       | 1.1303    | 0.00323   |          |          |
| Period (D)      | 2         | 0.3007    | 0.15034   | 67.69    | 0.0000   |
| A*D             | 2         | 0.1865    | 0.09325   | 41.98    | 0.0000   |
| B*D             | 8         | 0.2698    | 0.03373   | 15.19    | 0.0000   |
| A*B*D           | 8         | 0.2358    | 0.02948   | 13.27    | 0.0000   |
| Error A*B*C*D   | 700       | 1.5548    | 0.00222   |          |          |
| Season (E)      | 3         | 2.9012    | 0.96706   | 416.69   | 0.0000   |
| A*E             | 3         | 0.0182    | 0.00606   | 2.61     | 0.0502   |
| B*E             | 12        | 0.1647    | 0.01372   | 5.91     | 0.0000   |
| A*B*E           | 12        | 0.0558    | 0.00465   | 2.00     | 0.0212   |
| Error A*B*C*E   | 1050      | 2.4368    | 0.00232   |          |          |
| D*E             | 6         | 0.0327    | 0.00545   | 2.87     | 0.0086   |
| A*D*E           | 6         | 0.0501    | 0.00836   | 4.40     | 0.0002   |
| B*D*E           | 24        | 0.0822    | 0.00342   | 1.80     | 0.0097   |
| A*B*D*E         | 24        | 0.0751    | 0.00313   | 1.65     | 0.0247   |
| Error A*B*C*D*E | 2100      | 3.9849    | 0.00190   |          |          |
| Total           | 4319      | 14.1540   |           |          |          |

Table S11. Repeated Measures ANOVA Table for soil Volumetric Water Content (VWC) at 30 cm depth on the Cerro Seco study site, Valles Caldera National Preserve, New Mexico.

Treatment = Control/Thin-burned; Location = Log/N1/N2/S1/S2; Period = Pre-thinning/Post-thinning/Post-burning; Season = Fall/Winter/Spring/Summer.  
Subject = Replicate weekly means of variable tested.

| Source          | DF   | SS      | MS      | F      | P      |
|-----------------|------|---------|---------|--------|--------|
| TREATMENT (A)   | 1    | 0.6713  | 0.67132 | 260.56 | 0.0000 |
| Location (B)    | 4    | 0.0712  | 0.01780 | 6.91   | 0.0000 |
| A*B             | 4    | 0.2071  | 0.05178 | 20.10  | 0.0000 |
| Subject (C)     |      |         |         |        |        |
| Error A*B*C     | 350  | 0.9018  | 0.00258 |        |        |
| Period (D)      | 2    | 0.1617  | 0.08085 | 35.19  | 0.0000 |
| A*D             | 2    | 0.2305  | 0.11526 | 50.17  | 0.0000 |
| B*D             | 8    | 0.3092  | 0.03864 | 16.82  | 0.0000 |
| A*B*D           | 8    | 0.2397  | 0.02996 | 13.04  | 0.0000 |
| Error A*B*C*D   | 700  | 1.6082  | 0.00230 |        |        |
| Season (E)      | 3    | 2.9535  | 0.98451 | 450.71 | 0.0000 |
| A*E             | 3    | 0.0440  | 0.01466 | 6.71   | 0.0002 |
| B*E             | 12   | 0.1460  | 0.01216 | 5.57   | 0.0000 |
| A*B*E           | 12   | 0.0777  | 0.00647 | 2.96   | 0.0004 |
| Error A*B*C*E   | 1050 | 2.2936  | 0.00218 |        |        |
| D*E             | 6    | 0.0504  | 0.00840 | 4.61   | 0.0001 |
| A*D*E           | 6    | 0.0424  | 0.00707 | 3.88   | 0.0007 |
| B*D*E           | 24   | 0.0753  | 0.00314 | 1.72   | 0.0159 |
| A*B*D*E         | 24   | 0.0718  | 0.00299 | 1.64   | 0.0256 |
| Error A*B*C*D*E | 2100 | 3.8227  | 0.00182 |        |        |
| Total           | 4319 | 13.9779 |         |        |        |
