# Supplementary material for: Influence of Mixed Conifer Forest Thinning and Prescribed Fire on Soil Temperature and Moisture Dynamics in Proximity to Forest Logs: A Case Study in New Mexico, USA
Source: MDPI journal article supplement (doi:10.3390/f14061117), 2023-05-28
Supplement: s1 [file s1]

Archive with 6 entries (6 files):
- Supplemental Figure S1. Met station results on North Control site.pdf
- Supplemental Figure S2. Met station results on North Control site - wind and PAR.pdf
- Supplemental Figure S3. Soil temperatures at different depths.pdf
- Supplemental Figure S4. Soil moisture results.pdf
- Supplemental Tables S1¿CS5. Climate variables RMANOVA Tables.pdf
- Supplemental Tables S6¿CS11. Soil Variables RMANOVA Tables.pdf
