# Supplementary material for: Influence of Mixed Conifer Forest Thinning and Prescribed Fire on Soil Temperature and Moisture Dynamics in Proximity to Forest Logs: A Case Study in New Mexico, USA
Source: MDPI journal article supplement (doi:10.3390/f14061117), 2023-05-28
Supplement: s1 [file s1 › Supplemental Figure S1. Met station results on North Control site.pdf]

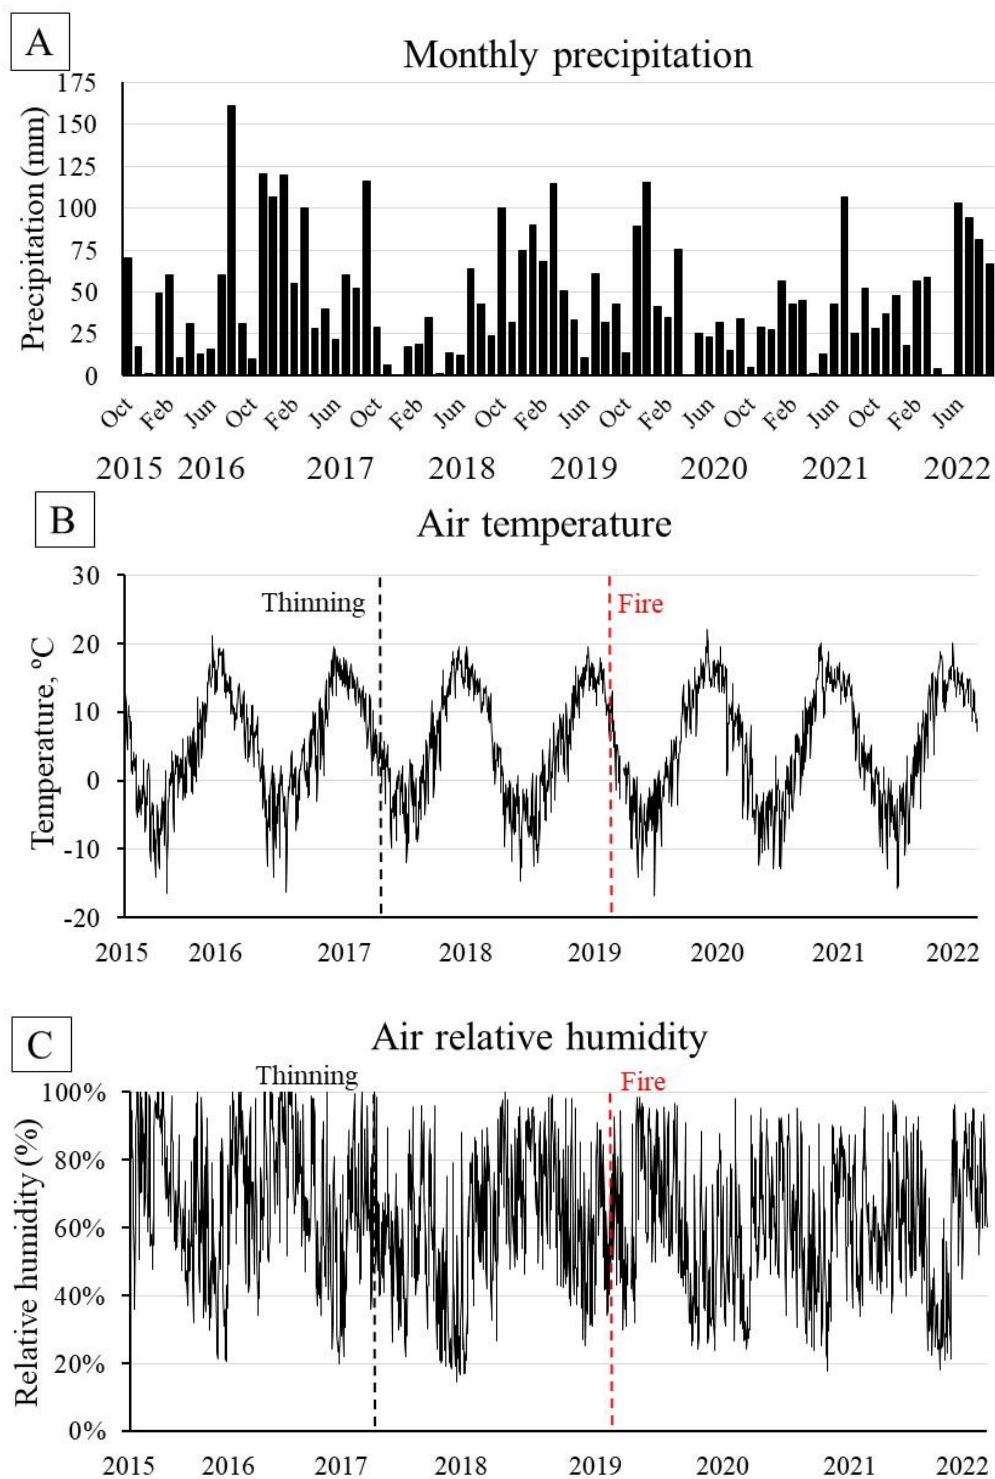

Figure S1. Precipitation, air temperature and relative humidity on the North Control site during 2015-2022, Valles Caldera National Preserve, NM.
