# Supplementary material for: Influence of Mixed Conifer Forest Thinning and Prescribed Fire on Soil Temperature and Moisture Dynamics in Proximity to Forest Logs: A Case Study in New Mexico, USA
Source: MDPI journal article supplement (doi:10.3390/f14061117), 2023-05-28
Supplement: s1 [file s1 › Supplemental Figure S4. Soil moisture results.pdf]

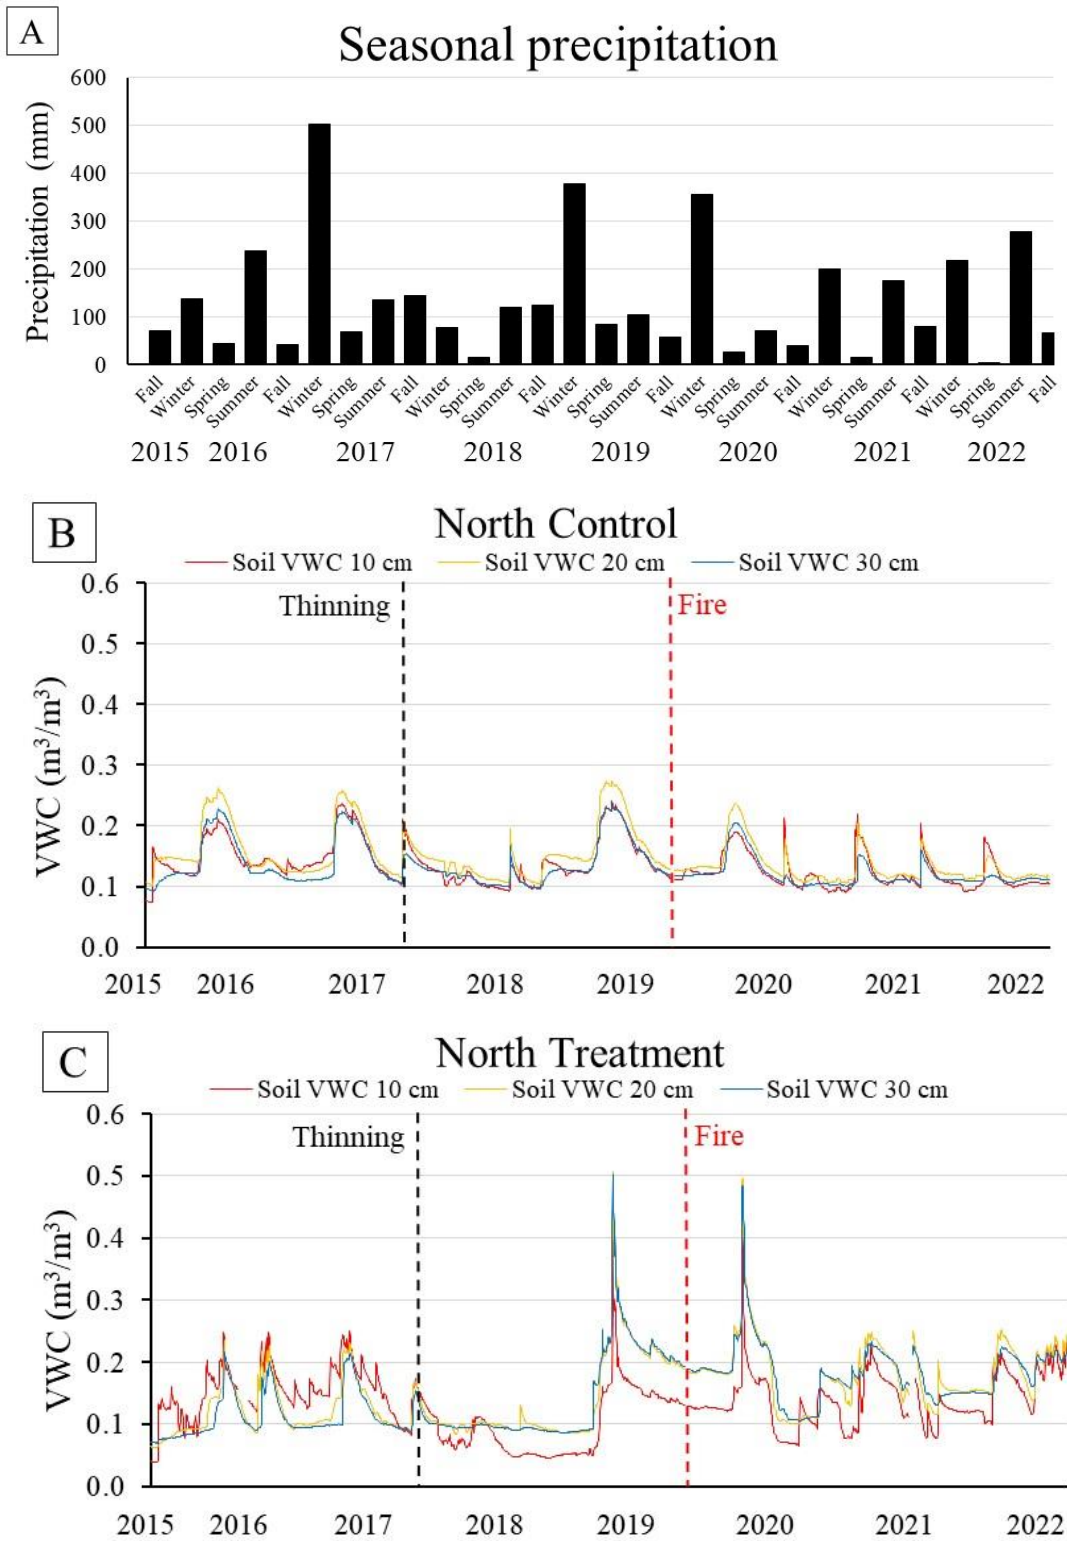

Figure S4. Seasonal precipitation and soil moisture (Volumetric Water Content, VWC) dynamics beneath logs during 2015-2022 on the Cerro Seco study site, Valles Caldera National Preserve, NM. A: Total precipitation by season; B: North Control site; C: North Treatment site.
