# Supplementary material for: Influence of Mixed Conifer Forest Thinning and Prescribed Fire on Soil Temperature and Moisture Dynamics in Proximity to Forest Logs: A Case Study in New Mexico, USA
Source: MDPI journal article supplement (doi:10.3390/f14061117), 2023-05-28
Supplement: s1 [file s1 › Supplemental Tables S1¿CS5. Climate variables RMANOVA Tables.pdf]

Table S1. Repeated Measures ANOVA Table for air temperature on the Cerro Seco study site, Valles Caldera National Preserve, New Mexico.

Treatment = Control/Thin-burned; Period = Pre-thinning/Post-thinning/Post-burning; Season = Fall/Winter/Spring/Summer.

Subject = Replicate weekly means of variable tested.

| Source        | DF  | SS      | MS      | F      | P      |
|---------------|-----|---------|---------|--------|--------|
| Treatment (A) | 1   | 34.3    | 34.34   | 2.08   | 0.1681 |
| Subject (B)   |     |         |         |        |        |
| Error A*B     | 16  | 263.6   | 16.47   |        |        |
| Period (C)    | 2   | 17.1    | 8.57    | 4.41   | 0.0203 |
| A*C           | 2   | 4.0     | 2.00    | 1.03   | 0.3683 |
| Error A*B*C   | 32  | 62.2    | 1.94    |        |        |
| Season (D)    | 3   | 8329.8  | 2776.60 | 116.15 | 0.0000 |
| A*D           | 3   | 1.6     | 0.53    | 0.02   | 0.9955 |
| Error A*B*D   | 48  | 1147.4  | 23.90   |        |        |
| C*D           | 6   | 49.0    | 8.16    | 6.43   | 0.0000 |
| A*C*D         | 6   | 0.2     | 0.04    | 0.03   | 0.9998 |
| Error A*B*C*D | 96  | 122.0   | 1.27    |        |        |
| Total         | 215 | 10031.2 |         |        |        |

Table S2. Repeated Measures ANOVA Table for relative humidity on the Cerro Seco study site, Valles Caldera National Preserve, New Mexico.

Treatment = Control/Thin-burned; Period = Pre-thinning/Post-thinning/Post-burning; Season = Fall/Winter/Spring/Summer.

Subject = Replicate weekly means of variable tested.

| <b>Source</b> | <b>DF</b> | <b>SS</b> | <b>MS</b> | <b>F</b> | <b>P</b> |
|---------------|-----------|-----------|-----------|----------|----------|
| Treatment (A) | 1         | 0.04725   | 0.04725   | 1.90     | 0.1867   |
| Subject (B)   |           |           |           |          |          |
| Error A*B     | 16        | 0.39732   | 0.02483   |          |          |
| Period (C)    | 2         | 0.47566   | 0.23783   | 38.08    | 0.0000   |
| A*C           | 2         | 0.00330   | 0.00165   | 0.26     | 0.7697   |
| Error A*B*C   | 32        | 0.19987   | 0.00625   |          |          |
| Season (D)    | 3         | 1.17580   | 0.39193   | 25.54    | 0.0000   |
| A*D           | 3         | 0.00290   | 0.00097   | 0.06     | 0.9791   |
| Error A*B*D   | 48        | 0.73665   | 0.01535   |          |          |
| C*D           | 6         | 0.45098   | 0.07516   | 14.75    | 0.0000   |
| A*C*D         | 6         | 0.00014   | 0.00002   | 0.00     | 1.0000   |
| Error A*B*C*D | 96        | 0.48931   | 0.00510   |          |          |
| Total         | 215       | 3.97919   |           |          |          |

Table S3. Repeated Measures ANOVA Table for PAR on the Cerro Seco study site, Valles Caldera National Preserve, New Mexico.

Treatment = Control/Thin-burned; Period = Pre-thinning/Post-thinning/Post-burning; Season = Fall/Winter/Spring/Summer.

Subject = Replicate weekly means of variable tested.

| <b>Source</b> | <b>DF</b> | <b>SS</b> | <b>MS</b> | <b>F</b> | <b>P</b> |
|---------------|-----------|-----------|-----------|----------|----------|
| Treatment (A) | 1         | 1108937   | 1108937   | 1292.05  | 0.0000   |
| Subject (B)   |           |           |           |          |          |
| Error A*B     | 16        | 13732     | 858       |          |          |
| Period (C)    | 2         | 703394    | 351697    | 603.02   | 0.0000   |
| A*C           | 2         | 565989    | 282995    | 485.22   | 0.0000   |
| Error A*B*C   | 32        | 18663     | 583       |          |          |
| Season (D)    | 3         | 735929    | 245310    | 112.19   | 0.0000   |
| A*D           | 3         | 105520    | 35173     | 16.09    | 0.0000   |
| Error A*B*D   | 48        | 104952    | 2186      |          |          |
| C*D           | 6         | 69716     | 11619     | 29.59    | 0.0000   |
| A*C*D         | 6         | 58601     | 9767      | 24.87    | 0.0000   |
| Error A*B*C*D | 96        | 37694     | 393       |          |          |
| Total         | 215       | 3523126   |           |          |          |

Table S4. Repeated Measures ANOVA Table for mean wind speed on the Cerro Seco study site, Valles Caldera National Preserve, New Mexico.

Treatment = Control/Thin-burned; Period = Pre-thinning/Post-thinning/Post-burning; Season = Fall/Winter/Spring/Summer.

Subject = Replicate weekly means of variable tested.

| <b>Source</b> | <b>DF</b> | <b>SS</b> | <b>MS</b> | <b>F</b> | <b>P</b> |
|---------------|-----------|-----------|-----------|----------|----------|
| Treatment (A) | 1         | 7.5655    | 7.56546   | 474.23   | 0.0000   |
| Subject (B)   |           |           |           |          |          |
| Error A*B     | 16        | 0.2553    | 0.01595   |          |          |
| Period (C)    | 2         | 5.2590    | 2.62950   | 272.01   | 0.0000   |
| A*C           | 2         | 2.6057    | 1.30285   | 134.78   | 0.0000   |
| Error A*B*C   | 32        | 0.3093    | 0.00967   |          |          |
| Season (D)    | 3         | 2.0291    | 0.67636   | 58.49    | 0.0000   |
| A*D           | 3         | 0.3519    | 0.11730   | 10.14    | 0.0000   |
| Error A*B*D   | 48        | 0.5551    | 0.01156   |          |          |
| C*D           | 6         | 0.6611    | 0.11018   | 15.93    | 0.0000   |
| A*C*D         | 6         | 0.2229    | 0.03715   | 5.37     | 0.0001   |
| Error A*B*C*D | 96        | 0.6639    | 0.00692   |          |          |
| Total         | 215       | 20.4787   |           |          |          |

Table S5. Repeated Measures ANOVA Table for maximum wind speed on the Cerro Seco study site, Valles Caldera National Preserve, New Mexico. Treatment = Control/Thin-burned; Period = Pre-thinning/Post-thinning/Post-burning; Season = Fall/Winter/Spring/Summer. Subject = Replicate weekly means of variable tested.

| <b>Source</b> | <b>DF</b> | <b>SS</b> | <b>MS</b> | <b>F</b> | <b>P</b> |
|---------------|-----------|-----------|-----------|----------|----------|
| Treatment (A) | 1         | 81.987    | 81.9868   | 958.22   | 0.0000   |
| Subject (B)   |           |           |           |          |          |
| Error A*B     | 16        | 1.369     | 0.0856    |          |          |
| Period (C)    | 2         | 100.136   | 50.0682   | 797.93   | 0.0000   |
| A*C           | 2         | 28.889    | 14.4446   | 230.20   | 0.0000   |
| Error A*B*C   | 32        | 2.008     | 0.0627    |          |          |
| Season (D)    | 3         | 24.166    | 8.0553    | 93.12    | 0.0000   |
| A*D           | 3         | 2.098     | 0.6994    | 8.09     | 0.0002   |
| Error A*B*D   | 48        | 4.152     | 0.0865    |          |          |
| C*D           | 6         | 5.149     | 0.8581    | 18.74    | 0.0000   |
| A*C*D         | 6         | 1.467     | 0.2446    | 5.34     | 0.0001   |
| Error A*B*C*D | 96        | 4.396     | 0.0458    |          |          |
| Total         | 215       | 255.818   |           |          |          |
